# Supplementary material for: Correction: Direct Regulation of Pitx3 Expression by Nurr1 in Culture and in Developing Mouse Midbrain
Source: PLoS One. 2020 May 22;15(5):e0233918. doi: 10.1371/journal.pone.0233918 (PMC7244126; doi:10.1371/journal.pone.0233918)
Supplement: S7 File — For the experiment represented in this file, there was one experimental sample per condition; cells F27-S42 in the Excel file include data for the pPitx3-I experiment, the 2 μg results from this experiment represent one replicate of the three independent experiments summarized in the Fig 4D graph. The raw data for the other replicates are not available. Two potential binding sites for Nurr1 on the Pitx3 promoter were identified, named pPitx3-I and pPitx3-II. Only promoter I (pPitx3-I) is significantly enriched after the ChIP and was assessed in following experiments. Quantification of Pitx3 promoter by qPCR after ChIP. Data obtained with 2 μg antibody are reported in the original Fig 4D. The efficiency of IP was calculated as follows: (a) ΔCt (CtIP − CtINPUT) was calculated considering the abundance of a target DNA sequence (bound or immunoprecipitated, CtIP) relative to input chromatin (CtINPUT); (b) the results were expressed as 2-ΔCt or as 2-ΔCt x 100 (.xls file column O). (XLSX) [file pone.0233918.s007.xlsx]

## Sheet: real time ChIP.txt
Sample Name	Detector Name	Ct			Assay #1	1	Input			un 0,5	25.3
IgG 0,5	elo2-fen	30.982				1	Pol 2						-25.3	4.13104e+07	-31	2147483648
IgG 1	elo2-fen	31.3064				1	IP Ab #1			Nurr1 0,5	30.3		5	0.03125	-0.7	1.6245
IgG 2	elo2-fen	30.9416			Ab #1 target binding	1	NIS/mock			IgG 0,5	31		5.7	0.0192366
IgG 4	elo2-fen	30.4538			on promoter site #1	2	Input			un 1	24.9
Nurr1 0,5	elo2-fen	30.3276				2	Pol 2						-24.9	3.13074e+07	-31.3	2.64386e+09	0.4	0.757858
Nurr1 1	elo2-fen	29.9758				2	IP Ab #1			Nurr1 1	30		5.1	0.0291573	-1.3	2.46229	0.1	0.933033
Nurr1 2	elo2-fen	29.0794				2	NIS/mock			IgG 1	31.3		6.4	0.0118415
nurr1 4	elo2-fen	28.7326				3	Input			un 2	25.6
no ab	elo2-fen	30.8228				3	Pol 2						-25.6	5.0859e+07	-30.9	2.00367e+09	-0.7	1.6245
						3	IP Ab #1			Nurr1 2	29.1		3.5	0.0883883	-1.8	3.4822	-1.6	3.03143
un 0,5	elo2-fen	25.3057				3	NIS/mock			IgG 2	30.9		5.3	0.0253829
un 1	elo2-fen	24.8751				4	Input			un 4	25.1
un2	elo2-fen	25.5981				4	Pol 2						-25.1	3.59627e+07	-30.4	1.41681e+09	0.5	0.707107
un 4	elo2-fen	25.1434				4	IP Ab #1			Nurr1 4	28.7		3.6	0.0824692	-1.7	3.24901	0.1	0.933033
un no ab	elo2-fen	25.0218				4	NIS/mock			IgG 4	30.4		5.3	0.0253829
Sample Name	Detector Name	Ct
IgG 0,5	PPTX3i	26.6611
IgG 1	PPTX3i	25.9318
IgG 2	PPTX3i	26.1931
IgG 4	PPTX3i	25.6239
Nurr1 0,5	PPTX3i	23.737
Nurr1 1	PPTX3i	25.3751
Nurr1 2	PPTX3i	23.11			Assay #1	1	Input			un 0,5	26.2
nurr1 4	PPTX3i	26.2866				1	Pol 2						-26.2	7.70878e+07	-26.6	1.01718e+08
no ab	PPTX3i	25.8272				1	IP Ab #1			Nurr1 0,5	23.7		-2.5	5.65685	-2.9	7.46426
					Ab #1 target binding	1	NIS/mock			IgG 0,5	26.6		0.4	0.757858
un 0,5	PPTX3i	26.1933			on promoter site #1	2	Input			un 1	26.3
un 1	PPTX3i	26.2849				2	Pol 2						-26.3	8.26207e+07	-25.9	6.26148e+07	-0.1	1.07177
un2	PPTX3i	26.3376				2	IP Ab #1			Nurr1 1	25.4		-0.9	1.86607	-0.5	1.41421	1.6	0.329877
un 4	PPTX3i	26.1146				2	NIS/mock			IgG 1	25.9		-0.4	1.31951
un no ab	PPTX3i	25.851				3	Input			un 2	26.3
						3	Pol 2						-26.3	8.26207e+07	-26.2	7.70878e+07	0	1
						3	IP Ab #1			Nurr1 2	23.1		-3.2	9.18959	-3.1	8.57419	-2.3	4.92458
Sample Name	Detector Name	Ct				3	NIS/mock			IgG 2	26.2		-0.1	1.07177
IgG 0,5	PPTX3II	24.7818				4	Input			un 4	26.1
IgG 1	PPTX3II	24.4505				4	Pol 2						-26.1	7.19255e+07	-25.6	5.0859e+07	0.2	0.870551
IgG 2	PPTX3II	23.9734				4	IP Ab #1			Nurr1 4	26.3		0.2	0.870551	0.7	0.615572	3.4	0.0947323
IgG 4	PPTX3II	22.4306				4	NIS/mock			IgG 4	25.6		-0.5	1.41421
Nurr1 0,5	PPTX3II	22.9348
Nurr1 1	PPTX3II	25.0936
Nurr1 2	PPTX3II	23.1956
nurr1 4	PPTX3II	24.4675
no ab	PPTX3II	24.3298
un 0,5	PPTX3II	23.4907
un 1	PPTX3II	25.5507			Assay #2	1	Input			un 0,5	23.5
un2	PPTX3II	25.3685				1	Pol 2						-23.5	1.18633e+07	-24.78	2.88087e+07
un 4	PPTX3II	24.721				1	IP Ab #1			Nurr1 0,5	22.9		-0.6	1.51572	-1.88	3.68075
un no ab	PPTX3II	24.9551			Ab #1 target binding	1	NIS/mock			IgG 0,5	24.78		1.28	0.411796
					on promoter site #2	2	Input			un 1	25.5
						2	Pol 2						-25.5	4.74531e+07	-24.4	2.21377e+07	-2	4
						2	IP Ab #1			Nurr1 1	25.1		-0.4	1.31951	0.7	0.615572	0.2	0.870551
						2	NIS/mock			IgG 1	24.4		-1.1	2.14355
						3	Input			un 2	25.4
						3	Pol 2						-25.4	4.42753e+07	-24	16777216
						3	IP Ab #1			Nurr1 2	23.2		-2.2	4.59479	-0.8	1.7411
						3	NIS/mock			IgG 2	24		-1.4	2.63902
						4	Input			un 4	24.7
						4	Pol 2						-24.7	2.72547e+07	-22.4	5.53442e+06	0.7	0.615572
						4	IP Ab #1			Nurr1 4	24.4		-0.3	1.23114	2	0.25	1.9	0.267943
						4	NIS/mock			IgG 4	22.4		-2.3	4.92458
PPTX3i
IgG 0,5	0.757858
Nurr1 0,5	5.65685
IgG 1	1.31951
Nurr1 1	1.86607
IgG 2	1.07177
Nurr1 2	9.18959
IgG 4	1.41421
Nurr1 4	0.870551
IgG 0,5	0.411796
Nurr1 0,5	1.51572
IgG 1	2.14355
Nurr1 1	1.31951
IgG 2	2.63902
Nurr1 2	4.59479
IgG 4	4.92458
Nurr1 4	1.23114
