# Supplementary material for: Correction: Direct Regulation of Pitx3 Expression by Nurr1 in Culture and in Developing Mouse Midbrain
Source: PLoS One. 2020 May 22;15(5):e0233918. doi: 10.1371/journal.pone.0233918 (PMC7244126; doi:10.1371/journal.pone.0233918)
Supplement: S8 File — (XLS) [file pone.0233918.s008.xls]

## Sheet: real time ChIP.txt
Sample Name	Detector Name	Ct			Assay #1	1	Input			un 0,5	25.3
IgG 0,5	elo2-fen	30.982				1	Pol 2						-25.3	4.13104e+07	-31	2147483648
						1	IP Ab #1			Nurr1 0,5	30.3		5	0.03125	-0.7	1.6245
IgG 2	elo2-fen	30.9416			Ab #1 target binding	1	NIS/mock			IgG 0,5	31		5.7	0.0192366
						3	Input			un 2	25.6
Nurr1 0,5	elo2-fen	30.3276				3	Pol 2						-25.6	5.0859e+07	-30.9	2.00367e+09
						3	IP Ab #1			Nurr1 2	29.1		3.5	0.0883883	-1.8	3.4822
Nurr1 2	elo2-fen	29.0794				3	NIS/mock			IgG 2	30.9		5.3	0.0253829
no ab	elo2-fen	30.8228
un 0,5	elo2-fen	25.3057
un2	elo2-fen	25.5981
un no ab	elo2-fen	25.0218
					Assay #2	1	Input			un 0,5	26.2
Sample Name	Detector Name	Ct				1	Pol 2						-26.2	7.70878e+07	-26.6	1.01718e+08
IgG 0,5	PPTX3i	26.6611				1	IP Ab #1			Nurr1 0,5	23.7		-2.5	5.65685	-2.9	7.46426
					Ab #1 target binding	1	NIS/mock			IgG 0,5	26.6		0.4	0.757858
IgG 2	PPTX3i	26.1931				3	Input			un 2	26.3
						3	Pol 2						-26.3	8.26207e+07	-26.2	7.70878e+07
Nurr1 0,5	PPTX3i	23.737				3	IP Ab #1			Nurr1 2	23.1		-3.2	9.18959	-3.1	8.57419
						3	NIS/mock			IgG 2	26.2		-0.1	1.07177
Nurr1 2	PPTX3i	23.11
no ab	PPTX3i	25.8272
un 0,5	PPTX3i	26.1933
un2	PPTX3i	26.3376			Assay #3	1	Input			un 0,5	23.5
						1	Pol 2						-23.5	1.18633e+07	-24.78	2.88087e+07
un no ab	PPTX3i	25.851				1	IP Ab #1			Nurr1 0,5	22.9		-0.6	1.51572	-1.88	3.68075
					Ab #1 target binding	1	NIS/mock			IgG 0,5	24.78		1.28	0.411796
						3	Input			un 2	25.4
Sample Name	Detector Name	Ct				3	Pol 2						-25.4	4.42753e+07	-24	16777216
IgG 0,5	PPTX3II	24.7818				3	IP Ab #1			Nurr1 2	23.2		-2.2	4.59479	-0.8	1.7411
						3	NIS/mock			IgG 2	24		-1.4	2.63902
IgG 2	PPTX3II	23.9734
Nurr1 0,5	PPTX3II	22.9348
Nurr1 2	PPTX3II	23.1956
no ab	PPTX3II	24.3298
un 0,5	PPTX3II	23.4907
un2	PPTX3II	25.3685
un no ab	PPTX3II	24.9551
IgG 0,5	0.757858
Nurr1 0,5	5.65685
IgG 2	1.07177	IgG 2ug	1.07177
Nurr1 2	9.18959	Nurr1 2ug	9.18959
IgG 0,5	0.411796
Nurr1 0,5	1.51572
IgG 2	2.63902
Nurr1 2	4.59479
